# Supplementary material for: Predictors of 1‐year drug‐related admissions in older multimorbid hospitalized adults
Source: PubMed Central journal article supplement — J Am Geriatr Soc. 2022 Jan 22;70(5):1510–6. doi: 10.1111/jgs.17667 (PMC9305949; doi:10.1111/jgs.17667), 2022-01-22
Supplement: JGS-70-1510-s001.pdf [file JGS-70-1510-s001.pdf]

## **SUPPLEMENTARY INFORMATION**

### **Predictors of 1-year drug-related admissions in older multimorbid hospitalized adults**

**Supplementary Text S1.** International Classification of Diseases German Modification version 10 codes for comorbidities not included in the Charlson Comorbidity Index.

Anemia: D50.X-D64.X  
Hypertension: I10.X-15.X  
Atrial fibrillation: I48.X  
Depression: F32.X

**Supplementary Text S2.** Anatomical Therapeutic and Chemical codes to define medication classes.

**Beta-blockers:**

C07AA01-C07AA02-C07AA03-C07AA05-C07AA06-C07AA07-C07AA12-C07AA14-C07AA15-C07AA16-C07AA17-C07AA19-C07AA23-C07AA27 -C07AB01-C07AB02-C07AB03-C07AB04-C07AB05-C07AB06-C07AB07-C07AB08-C07AB09-C07AB10-C07AB11-C07AB12-C07AB13-C07AB14-C07AG01-C07AG02-C07BB02-C07BB03-C07BB04-C07BB06-C07BB07-C07BB12-C07BB52-C07BG01-C07CA02-C07CA03-C07CA17-C07CA23-C07CB02-C07CB03-C07CB53-C07CG01-C07DA06-C07CB53-C07DB01-C07BA02-C07BA05-C07BA06-C07BA07-C07BA12-C07BA68-C07FB02-C07FB03-C07FB07-C07FB12-C07FB13-C07FX01-C07FX02-C07FX03-C07FX04-C07FX05-C07FX06

**Calcium channel blockers:**

C07FB02-C07FB03-C07FB07-C07FB12-C07FB13-C08CA01-C08CA02-C08CA03-C08CA04-C08CA05-C08CA06-C08CA07-C08CA08-C08CA09-C08CA10-C08CA11-C08CA12-C08CA13-C08CA14-C08CA15-C08CA16-C08CA51-C08CA55-C08CX01-C08EA01-C08EA02-C08EX01-C08EX02-C08GA01-C08GA02

**Alpha-blockers:**

C02AA01-C02AA02-C02AA03-C02AA04-C02AA05-C02AA06-C02AA07-C02AA52-C02AA53-C02AA57-C02AB01-C02AB02-C02AC01-C02AC02-C02AC03-C02AC04-C02AC05-C02AC06-C02C-C02BB01-C02BA01-C02CA01-C02CA02-C02CA03-C02CA04-C02CA06-C02CC01-C02CC02-C02CC03-C02CC04-C02CC05-C02CC06-C02CC07-`var' ==C02LA01-C02LA02 - C02LA03-C02LA04-C02LA07-C02LA08-C02LA09-C02LA50-C02LA51-C02LA52-C02LA71-C02LB01-C02LC01-C02LC05-C02LC51-C02LE01

**Renin angiotensin system blockers:**

C09AA01-C09AA02-C09AA03-C09AA04-C09AA05-C09AA06-C09AA07-C09AA08-C09AA09-C09AA10-C09AA11-C09AA12-C09AA15-C09AA13-C09AA14-C09AA16-C09BA01-C09BA02-C09BA03-C09BA04-C09BA05-C09BA06-C09BA07-C09BA08-C09BA09-C09BA10-C09BA11-C09BA12-C09BA13-C09BA15-C09BB02-C09BB03-C09BB05-C09BB06-C09BB07-C09BB10-C09BB12-C09BX01-C09BX02-C09BX03-C09BX04-A02AB05-A02AB06-A02AB07-A02AB10-A02AC01-A02AC02-A02AC10-A02AD01-A02AD02-A02AD03-A02AD04-A02AD05-A02AF01-A02AF02-A02AG-A02AH-A02AX

**Nitrates:**

C01DA02-C01DA04-C01DA05-C01DA07-C01DA08-C01DA06-C01DA13-C01DA14-C01DA20-C01DA38-C01DA52-C01DA54-C01DA55-C01DA57-C01DA58-C01DA59-C01DA63-C01DA70

**Diuretics:**

C03AA01-C03AA02-C03AA03-C03AA04-C03AA05-C03AA06-C03AA07-C03AA08-C03AA09-C03AA13-C03AB01-C03AB02-C03AB03-C03AB04-C03AB05-C03AB06-C03AB07-C03AB08-C03AB09-C03AH01-C03AH02-C03AX01-C03BA03-C03BA04-C03BA05-C03BA07-C03BA08-C03BA09-C03BA10-C03BA11-C03BA12-C03BA13-C03BA82-C03BB02-C03BB04-C03BB05-C03BB06-C03BB07-C03BC01-C03BD01-C03BB02-C03BX03-C03CA01-C03CA02-C03CA03-C03CA04-C03CC01-C03CC02-C03CB01-C03CB02-C03CD01-C03CX01-C03DA01-C03DA02-C03DA03-C03DA04-C03DB01-C03DB02-C03EA01-C03EA05-C03EA06-C03EA04-C03EA05-

C03EA06-C03EA07-C03EA12-C03EA13-C03EA14-C03EB01-C03EB02 -C09BA01-C09BA02-C09BA03-C09BA04-C09BA05-C09BA06-C09BA07-C09BA08-C09BA09-C09BA10-C09BA11-C09BA12-C09BA13-C09BA15-C09BX03-C09BX01-C02LA01-C02LA02 -C02LA03-C02LA04-C02LA07-C02LA08-C02LA09-C02LA50-C02LA51-C02LA52-C02LA71-C02LB01-C02LC01-C02LC05-C02LC51-C02LE01-C02LF01-C02LG01-C02LG02-C02LG03-C02LG51-C02LG73-C02LK01-C02LL01-C02LX01-C07BA05-C07BA06-C07BA07-C07BA12-C07BA68-C07BB02-C07BB03-C07BB04-C07BB06-C07BB07-C07BB12-C07BB52-C07BG01-C07CA02-C07CA03-C07CA17-C07CA23-C07CB02-C07CB03-C07CB53-C07CG01-C07DA06-C07CB53-C07DB01-C07BA02-C07BA05-C07BA06-C07BA07-C07BA12-C07BA68-C08GA01-C08GA02

**Antiplatelets:**

B01AC01-B01AC02-B01AC03-B01AC04-B01AC05-B01AC06-B01AC07-B01AC08-B01AC09-B01AC10-B01AC11-B01AC13-B01AC15-B01AC16-B01AC17-B01AC18-B01AC19-B01AC21-B01AC22-B01AC23-B01AC24-B01AC25-B01AC26-B01AC27-B01AC30-B01AC56

**Anticoagulants:**

B01AA01-B01AA02-B01AA03-B01AA04-B01AA07-B01AA08-B01AA09-B01AA10-B01AA11-B01AA12-B01AB01-B01AB02-B01AB04-B01AB05-B01AB06-B01AB07-B01AB08-B01AB09-B01AB10-B01AB11-B01AB12-B01AE01-B01AE01-B01AE02-B01AE04-B01AE05-B01AE06-B01AE07-B01AF01-B01AF02-B01AF03-B01AF04-B01AX01-B01AX04-B01AX05-B01AX07

**Antidiabetic agents other than insulin:**

A10BX01-A10BX02-A10BX03-A10BX08-A10BX05-A10BX06 -A10BK01-A10BK02-A10BK03-A10BK04-A10BK05-A10BK06-A10BD15-A10BD16-A10BD19-A10BD20-A10BD21-A10BD23-A10BD24-A10BD25-A10BJ01-A10BJ02-A10BJ03-A10BJ04-A10BJ05-A10BJ06-A10BD14-A10BH01-A10BH02-A10BH03-A10BH04-A10BH05-A10BH06-A10BH07-A10BH51-A10BH52-A10BD07-A10BD08-A10BD09-A10BD10-A10BD11-A10BD12-A10BD13-A10BD18-A10BD19-A10BD21-A10BD22-A10BD24-A10BD25-A10BF01-A10BF02-A10BF03-A10BD17-A10BG01-A10BG02-A10BG03-A10BD03-A10BD05-A10BD04-A10BD06-A10BD09 - A10BB01-A10BB02-A10BB03-A10BB04-A10BB05-A10BB06-A10BB07-A10BB08-A10BB09-A10BB10-A10BB11-A10BB12-A10BB31-A10BC01-A10BD01-A10BD02-A10BD04-A10BD06-A10BA01-A10BA02-A10BA03-A10BD01-A10BD02-A10BD03-A10BD01-A10BD02-A10BD03-A10BD01-A10BD02-A10BD03-A10BD01-A10BD02-A10BD03-A10BD05-A10BD07-A10BD08-A10BD10-A10BD11-A10BD13-A10BD14-A10BD15-A10BD16-A10BD17-A10BD18-A10BD20-A10BD23-A10BD24-A10BD25

**Insulin:**

A10AB01 -A10AD01-A10AD02-A10AD03-A10AD04-A10AD05-A10AD06-A10AD30-A10AE01-A10AE02-A10AE03-A10AE04-A10AE05-A10AE06-A10AE30-A10AE54-A10AE56-A10AF01-A10AB02-A10AB03-A10AB04-A10AB05-A10AB06-A10AB30-A10AC01-A10AC02-A10AC03-A10AC04-A10AC30

**Non-steroidal anti-inflammatory drugs:**

M01AA01-M01AA02-M01AA03-M01AA05-M01AA06-M01AB01-M01AB01-M01AB01-M01AB02-M01AB03-M01AB04-M01AB05-M01AB06-M01AB07-M01AB08-M01AB09-M01AB12-M01AB13-M01AB14-M01AB15-M01AB16-M01AB17-M01AB51-M01AB55-M01AC01-M01AC02-M01AC04-M01AC05-M01AC06-M01AC56-M01AE01-M01AE02-M01AE03-M01AE04-M01AE05-M01AE06-M01AE07-M01AE08-M01AE09-M01AE10-M01AE11-M01AE12-M01AE13-M01AE14-M01AE15-M01AE16-M01AE17-M01AE18-M01AE51-M01AE52-M01AE53-M01A5E6-M01AG01-M01AG02-M01AG03-M01AG04-M01AH01-M01AH02-M01AH03-M01AH04-M01AH05-M01AH06-M01AH07-M01AX01-M01AX02-M01AX04-M01AX05-M01AX07-M01AX12-M01AX13-M01AX14-M01AX17-M01AX18-M01AX21-M01AX22-M01AX23-M01AX24-M01AX25-M01AX26-M01AX68

**Opioids:**

N02AA01 -N02AA02-N02AA03-N02AA04-N02AA05-N02AA08-N02AA10-N02AA51-N02AA53-  
N02AA55-N02AA56-N02AA58-N02AA59-N02AA79-N02AB01-N02AB02-N02AB03-N02AB52-  
N02AB72-N02AC01-N02AC03-N02AC04-N02AC05-N02AC52-N02AC54-N02AC74-N02AD01-  
N02AD02-N02AE01-N02AF01-N02AF02-N02AG01-N02AG02-N02AG03-N02AG04-N02AJ01-  
N02AJ02-N02AJ03-N02AJ06-N02AJ07-N02AJ08-N02AJ09-N02AJ13-N02AJ14-N02AJ15-  
N02AJ17-N02AJ18-N02AJ19-N02AX01-N02AX02-N02AX03-N02AX05-N02AX06-N02BA01

**Oral corticosteroids:**

H02AB01-H02AB02-H02AB03-H02AB04 -H02AB05-H02AB06-H02AB07-H02AB08-H02AB09-  
H02AB10-H02AB11-H02AB12-H02AB13-H02AB14-H02AB415-H02AB17-H02AX01

**Proton pump inhibitors:**

A02BC01-A02BC02-A02BC03-A02BC04-A02BC05-A02BC06-A02BC07-A02BC08-A02BC53-  
A02BD01-A02BD02-A02BD03-A02BD04-A02BD05-A02BD06-A02BD07-A02BD09-A02BD10-  
A02BD11-A02BD12-A02BD13-A02BD14-A02BD15-B01AC56

**Hypnotics:**

N05BA01-N05BA02-N05BA03-N05BA04-N05BA05-N05BA06-N05BA07-N05BA08-N05BA09-  
N05BA10-N05BA11-N05BA12-N05BA13-N05BA14-N05BA15-N05BA16-N05BA17-N05BA18-  
N05BA19-N05BA21-N05BA22-N05BA23-N05BA24-N05BA56-N05CD01-N05CD02-N05CD03-  
N05CD04-N05CD05-N05CD06-N05CD07-N05CD08-N05CD09-N05CD10-N05CD11-N05CD12-  
N05CD13-N05CD14-N05CF01-N05CF02-N05CF03-N05CF04

**Antidepressants:**

N06AB02-N06AB03-N06AB04-N06AB05-N06AB06-N06AB07-N06AB08-N06AB09-N06AB10-  
N06AA01-N06AA02-N06AA03-N06AA04-N06AA05-N06AA06-N06AA07-N06AA08-N06AA09-  
N06AA10-N06AA11-N06AA12-N06AA13-N06AA14-N06AA15 -N06AA16-N06AA17-N06AA18-  
N06AA19-N06AA21-N06AA23-N06AF01-N06AF02-N06AF03-N06AF04-N06AF05-N06AF06-  
N06AG02-N06AG03-N06AX01-N06AX02-N06AX03-N06AX04-N06AX05-N06AX06-N06AX07-  
N06AX08-N06AX09-N06AX10 -N06AX11 -N06AX12-N06AX13-N06AX14-N06AX15-N06AX16-  
N06AX17-N06AX18-N06AX19-N06AX21-N06AX22-N06AX23-N06AX24-N06AX25-N06AX26-  
N06AX27-N06CA01-N06CA02-N06CA03

**Antipsychotics:**

N05AA01-N05AA02-N05AA03-N05AA04-N05AA05-N05AA06-N05AA07-N05AB01-N05AB02-  
N05AB03-N05AB04-N05AB05-N05AB06-N05AB07-N05AB08-N05AB09-N05AB10-N05AC01-  
N05AC02-N05AC03-N05AC04-N05AD01-N05AD02-N05AD03-N05AD04-N05AD05-N05AD06-  
N05AD07-N05AD08-N05AD09-N05AE01-N05AE02-N05AE03-N05AE04-N05AE05-N05AF01-  
N05AF02-N05AF03-N05AF04-N05AF05-N05AG01-N05AG02-N05AG03-N05AH01-N05AH02-  
N05AH03-N05AH04-N05AH05-N05AH06-N05AL01-N05AL02-N05AL03-N05AL04-N05AL05-  
N05AL06-N05AL07-N05AX07-N05AX08-N05AX09-N05AX10-N05AX11-N05AX12-N05AX13-  
N05AX14-N05AX15-N05AX16-N05AX17

**Antiparkinsonian agents:**

N04AA01-N04AA02-N04AA03-N04AA04-N04AA05-N04AA08-N04AA09-N04AA10-N04AA11-  
N04AA12 -N04AB01-N04AB02-N04AC01-N04AC30-N04BA01-N04ABA02-N04BA03-  
N04ABA04-N04BA05-N04ABA06-N04BB01-N04BC01-N04ABC02-N04BC03-N04ABC04-  
N04BC05-N04ABC06-N04ABC07-N04ABC08-N04ABC09-N04BD01-N04ABD02-N04BD03-  
N04BX01-N04ABX02-N04BX03-N04BX04

**Supplemental Table 1.** Results of univariable logistic regression analysis.

| <b>Variables</b>                                          | <b>OR (95%CI)</b> | <b>P-value</b>   |
|-----------------------------------------------------------|-------------------|------------------|
| <b>Age</b>                                                | 1.02 (1.00-1.03)  | <b>0.14</b>      |
| <b>Sex (female)</b>                                       | 0.84 (0.68-1.04)  | <b>0.12</b>      |
| <b>Hospitalizations &lt;1 year, n</b>                     |                   |                  |
| 0                                                         | <i>Reference</i>  | -                |
| 1                                                         | 1.45 (1.12-1.88)  | <b>0.005</b>     |
| 2                                                         | 1.47 (1.04-2.09)  | <b>0.03</b>      |
| ≥3                                                        | 2.73 (1.98-3.77)  | <b>&lt;0.001</b> |
| <b>Emergency room &lt;6 months</b>                        | 1.17 (0.93-1.47)  | <b>0.18</b>      |
| <b>Non-elective admission</b>                             | 1.63 (1.25-2.15)  | <b>0.001</b>     |
| Length of stay, days                                      | 1.00 (0.99-1.00)  | 0.36             |
| <b>Surgical ward (vs. medical ward)</b>                   | 0.60 (0.43-0.83)  | <b>0.002</b>     |
| Discharge home                                            | 0.99 (0.78-1.26)  | 0.96             |
| <b>Number of comorbidities</b>                            | 1.15 (1.09-1.21)  | <b>&lt;0.001</b> |
| <b>Congestive heart failure</b>                           | 1.56 (1.23-1.96)  | <b>&lt;0.001</b> |
| <b>Atrial fibrillation</b>                                | 1.45 (1.16-1.80)  | <b>0.001</b>     |
| <b>Myocardial infarction</b>                              | 1.35 (0.97-1.88)  | <b>0.08</b>      |
| Stroke                                                    | 1.01 (0.80-1.28)  | 0.92             |
| <b>Hypertension</b>                                       | 0.72 (0.58-0.91)  | <b>0.005</b>     |
| Peripheral vascular disorder                              | 1.16 (0.90-1.51)  | 0.26             |
| <b>Chronic kidney disease</b>                             | 1.53 (1.22-1.92)  | <b>&lt;0.001</b> |
| <b>Chronic kidney disease stage 3</b>                     | 1.55 (1.14-2.10)  | 0.005            |
| Chronic kidney disease stage 4                            | 1.36 (0.71-2.61)  | 0.71             |
| <b>Chronic kidney disease stage 5</b>                     | 2.22 (0.79-6.23)  | 0.13             |
| Chronic hepatitis / cirrhosis without portal hypertension | 1.11 (0.65-1.89)  | 0.70             |
| <b>Cirrhosis with portal hypertension</b>                 | 3.36 (1.33-8.53)  | <b>0.01</b>      |
| <b>Anemia</b>                                             | 1.35 (1.08-1.63)  | <b>0.008</b>     |
| <b>Diabetes</b>                                           | 1.26 (0.98-1.61)  | <b>0.07</b>      |
| <b>Blood malignancy</b>                                   | 1.78 (1.06-2.98)  | <b>0.03</b>      |
| Solid tumor without metastasis                            | 1.08 (0.83-1.41)  | 0.55             |
| Metastatic solid tumor                                    | 1.08 (0.62-1.89)  | 0.78             |
| <b>Chronic pulmonary disease</b>                          | 1.41 (1.12-1.78)  | <b>0.004</b>     |
| Connective tissue disorder                                | 1.12 (0.75-1.67)  | 0.60             |
| Peptic ulcer disease                                      | 1.15 (0.69-1.94)  | 0.59             |
| <b>Hemiplegia</b>                                         | 0.57 (0.28-1.17)  | <b>0.13</b>      |
| Dementia                                                  | 0.84 (0.55-1.29)  | 0.43             |
| <b>Depression</b>                                         | 1.34 (0.87-2.06)  | <b>0.19</b>      |
|                                                           | 1.06 (1.04-1.09)  | <b>&lt;0.001</b> |
| <b>Number of chronic medications</b>                      | 1.10 (0.89-1.37)  | 0.37             |
| Beta-blocker                                              | 0.94 (0.74-1.19)  | 0.62             |
| Renin angiotensin system blocker                          | 0.75 (0.57-0.97)  | <b>0.03</b>      |
| <b>Calcium channel blocker</b>                            | 1.09 (0.56-2.05)  | 0.80             |
| Alpha-blocker                                             | 1.44 (1.16-1.78)  | <b>&lt;0.001</b> |
| <b>Diuretic</b>                                           | 0.90 (0.59-1.38)  | 0.64             |
| Nitrate                                                   |                   | 0.97             |
| Anticoagulant and antiplatelet                            |                   |                  |

|                                             |                          |                  |
|---------------------------------------------|--------------------------|------------------|
|                                             | 0.99 (0.70-              | <b>0.03</b>      |
| <b>Anticoagulant alone</b>                  | 1.42) <b>1.28 (1.02-</b> | 0.97             |
| Antiplatelet alone                          | <b>1.61)</b>             | 0.43             |
| Statin                                      | 1.00 (0.80-1.2.5)        | <b>0.07</b>      |
| <b>Proton pump inhibitor</b>                | 0.92 (0.74-1.14)         | 0.64             |
| Antidiabetic other than insulin             | 1.22 (0.98-1.52)         | <b>0.03</b>      |
| <b>Insulin</b>                              | 0.92 (0.65-1.30)         | <b>&lt;0.001</b> |
| <b>Oral corticosteroid</b>                  | 1.39 (1.03-1.87)         | <b>0.01</b>      |
| <b>Non-steroidal anti-inflammatory drug</b> | 1.87 (1.41-2.49)         | <b>0.17</b>      |
| <b>Opioid</b>                               | 0.46 (0.25-0.88)         | 0.20             |
| Hypnotic                                    | 1.21 (0.92-1.59)         | 0.51             |
| Antidepressant                              | 1.18 (0.92-1.52)         | 0.77             |
| Antipsychotic                               | 1.09 (0.84-1.40)         | 0.61             |
| Antiparkinsonian                            | 1.07 (0.68-1.69)         |                  |
|                                             | 0.87 (0.39-1.73)         |                  |

**Abbreviations:** CI, confidence interval; OR, odds ratio.

**Legend:** Variables with a p-value <0.20 (highlighted in bold) were entered in the multivariable backward regression.
